# Supplementary material
Source: publisher figshare collection journal article supplement (https://scielo.figshare.com/articles/dataset/_/9796265)
Supplement: Supplementary file 1 [file Table_1.xls]

## Sheet: Table_1
<b></b>	<b>Preoperative</b>	<b>Postoperative</b>	<b><em>p</em></b>
BCVA (logMAR)	0.21 ± 0.88	0.09 ± 0.85	0.001
IOP (mmHg)	14.13 ± 2.61	13.53 ± 2.90	0.12
