# Supplementary material
Source: publisher figshare collection journal article supplement (https://scielo.figshare.com/articles/dataset/_/9796265)
Supplement: Supplementary file 2 [file Table_2.xls]

## Sheet: Table_2
<b>Yamane et al.</b>	<b>Our study</b>	<b>Advantages of our modified technique</b>
30-gauge thin-walled needle	27-gauge needle	Freely avaible and appropriate for every 3-piece IOL
Nasal and temporal quadrants for sclerotomy	6 and 12 o’clock positionsfor sclerotomy	Haptic-related complications of exposure, conjunctival scar formation, discomfort are minimized
Double needle	Single needle	The possibility of the first haptic emerging from the needle lumen due to the IOL position and manipulation during the entry of the second haptic into the needle lumen is eliminated
More corneal ports are needed	Single corneal port is used	Less invasive method
Angled sclerotomy	Sclerotomy with 2 mm scleral tunnel	Postoperative complications such as IOL tilt, decentralization and iris capture were not observed in the early period
